# Supplementary material for: A Computational Study on the Role of Gap Junctions and Rod Ih Conductance in the Enhancement of the Dynamic Range of the Retina
Source: PLOS journal article supplement (doi:10.1371/journal.pone.0006970), 2009-09-23
Supplement: S1 (10.1371/journal.pone.0006970.s001) [file journal.pone.0006970.s001]

# A computational study on the role of gap junctions and rod $I_h$ conductance in the enhancement of the dynamic range of the retina

Rodrigo Publico<sup>1\*</sup>, Rodrigo F. Oliveira<sup>2</sup>, Antonio C. Roque<sup>3</sup>

**1 Computational Neuroscience Unit, Okinawa Institute of Science and Technology. 7542 Onna, Onna-son, Okinawa 904-0411, Japan.**

**2 Computational and Experimental Neuroplasticity Laboratory. The Krasnow Institute for Advanced Study, George Mason University, Fairfax, VA, USA**

**3 Department of Physics and Mathematics, FFCLRP. University of São Paulo, Ribeirão Preto, Brazil**

\* E-mail: Corresponding publico@oist.jp

## Supporting Information

The retina conductance based model was created using the NEURON software [37] and it is composed of single compartment neuron models with passive parameters described in Table 1 of the main text. The conductances and reversal potentials for the neuron models are described in Table 1. For all conductances in the model we used the Hodgkin-Huxley formulation [46] where the activation, inactivation and non-inactivating variables ( $m, n, h$ ) were numerically calculated as :

$$\frac{dx}{dt} = \alpha(1 - x) - \beta x \quad (1)$$

where  $x$  represents any of the  $m, n, h$  variables, and  $\alpha$  and  $\beta$  are the voltage-dependent activation and inactivation rates.

For all compartments in the neuron models that express calcium dependent channels the same calcium removal mechanism was used. The calcium influx is controlled by the voltage gated calcium and calcium dependent channels while the efflux is given by the second term in the following expression :

$$\frac{d[Ca^{+2}]_i}{dt} = \frac{-kI_{Ca}}{2Fd} - \frac{K_T[Ca^{+2}]_i}{[Ca^{+2}]_i + K_d} \quad (2)$$

where  $k = 0.1$ ,  $d = 1\mu m$ ,  $K_T = 10^{-4}mM/ms$ ,  $K_d = 10^{-4}mM$  and F is the Faraday constant.

### ***Rod photoreceptor***

The rod model is based on the single compartment model described in our previous work [16]. The modified model has a potassium current with fast dynamics responsible to accelerate the response to light stimulus ( $I_{Kx}$ ), a potassium current with rectifier characteristics ( $I_{Kv}$ ), a calcium dependent potassium current ( $I_{KCa}$ ), a hyperpolarization activated current ( $I_h$ ), a L-type calcium current ( $I_{Ca}$ ) and a calcium dependent chloride current ( $I_{Cl(Ca)}$ ) with parameters and dynamics taken from the references indicated in Table 2 and Table 4.

### ***Cone photoreceptor***

The cone model is a modified version of the single compartment model described by Kourennyi and others [17]. The modified model has a potassium current with rectifier characteristics ( $I_{Kv}$ ), a calcium dependent potassium current ( $I_{KCa}$ ), a hyperpolarization activated current ( $I_h$ ), a calcium current ( $I_{Ca}$ ) and a calcium dependent chloride current ( $I_{Cl(Ca)}$ ) with parameters and dynamics taken from the references indicated in Table 2 and Table 4.

### ***Rod and cone bipolar cell***

The bipolar cells participate in both the rod and cone circuits connecting AII amacrine cells and ganglion cells [2, 3]. In this work we used the same model to simulate both the rod bipolar cell and the cone bipolar cell. The only difference between the single compartment models is that the rod bipolar cell model expresses the TEA sensitive  $I_A$  current [19]. The model is based on the single compartment model described by Usui and others [19] and has a potassium current with rectifier characteristics ( $I_{Kv}$ ), a calcium dependent potassium current ( $I_{KCa}$ ), a hyperpolarization activated current ( $I_h$ ), a calcium current ( $I_{Ca}$ ) and a TEA-sensitive potassium current ( $I_A$ ) with parameters and dynamics taken from the references indicated in Table 2 and Table 6.

#### ***AII amacrine cell***

The AII amacrine cell model is a modified version of the single-compartment model described by Smith and Vardi [24]. The modified model has only the Hodgkin-Huxley sodium and potassium channels [46] with parameters and dynamics taken from the references indicated in Table 2 of the main text and Table 7. The potassium current is activated when the cell is depolarized to -20mV while the sodium current is activated at -30 mV [24].

#### ***Ganglion cell***

The ganglion cell model is a modified version of the single-compartment model described by Fohlmeister and Miller [25]. The modified model has a potassium current with rectifier characteristics ( $I_{Kv}$ ), a calcium dependent potassium current ( $I_{KCa}$ ), a calcium current ( $I_{Ca}$ ), a TEA-sensitive potassium current ( $I_A$ ) and the Hodgkin-Huxley sodium channels with parameters and dynamics taken from the references indicated in Table 2 and Table 8.

## References

1. Sterling P, Freed MA, Smith RG (1988) Architecture of rod and cone circuits to the *on*-beta ganglion cell. *J Neurosci* 8: 623-642.
2. Deans MR, Volgyi B, Goodenough D, Bloomfield S, Paul D (2002) Connexin36 is essential for transmission of rod-mediated visual signals in the mammalian retina. *Neuron* 36: 703-712.
3. Volgyi B, Deans M, Paul D, Bloomfield L (2004) Convergence and segregation of the multiple rod pathways in mammalian retina. *J Neurosci* 24: 11182-11192.
4. Veruki ML, Oltedal L, Hartveit E (2008) Electrical Synapses Between AII Amacrine Cells: Dynamic Range and Functional Consequences of Variation in Junctional Conductance. *J Neurophysiol* 100: 3305-3322.
5. Veruki ML, Hartveit E (2009) Meclofenamic Acid Blocks Electrical Synapses of Retinal AII Amacrine and ON-Cone Bipolar Cells. *J Neurophysiol* 101: 2339-2347.
6. Tessier-Lavigne M, Attwell D (1988) The effect of photoreceptor coupling and synapse nonlinearity on signal:noise ratio in early visual processing. *Proc R Soc Lond B* 234: 171-197.
7. Hornstein EP, Verweij J, Li PH, Schnapf JL (2005) Gap-junctional coupling and absolute sensitivity of photoreceptors in macaque retina. *J Neurosci* 25: 11201-11209.
8. Vardi N, Smith R (1996) The aii amacrine network: coupling can increase correlated activity. *Vision Res* 36: 3743-3757.
9. Petrides A, Trexler EB (2008) Differential output of the high-sensitivity rod photoreceptor: Aii amacrine pathway. *J Comp Neurol* 507: 1653-1662.

10. Copelli M, Roque AC, Oliveira RF, Kinouchi O (2002) Physics of psychophysics: Stevens and weber-fechner laws are transfer functions of excitable media. *Phys Rev E* 65: 060901.
11. Copelli M, Oliveira RF, Roque AC, Kinouchi O (2005) Signal compression in the sensory periphery. *Neurocomputing* 63-64: 691-696.
12. Furtado LS, Copelli M (2006) Response of electrically coupled spiking neurons: A cellular automaton approach. *Physical Review E* 73:011907.
13. Kinouchi O, Copelli M (2006) Optimal dynamical range of excitable networks at criticality. *Nature Physics* 2: 348-351.
14. Baylor DA, Matthews G, Nunn BJ (1984) Location and function of voltage-sensitive conductances in retinal rods of salamander, *Ambystoma tigrinum*. *J Physiol* 354: 203-223.
15. Kamiyama Y, Ogura T, Usui S (1996) Ionic current model of the vertebrate rod photoreceptor. *Vision Res* 36: 4059-4068.
16. Publio R, Oliveira RF, Roque AC (2006) A realistic model of rod photoreceptor for use in a retina network model. *Neurocomputing* 69: 1020-1024.
17. Kourennyi D, Liu X, Hart J, Mahmud F, Baldrige W, et al. (2004) Reciprocal modulation of calcium dynamics at rod and cone photoreceptor synapses by nitric oxide. *J Neurophysiol* 92: 477-483.
18. Liu XD, Kourennyi DE (2004) Effects of tetraethylammonium on  $k_x$  channels and simulated light response in rod photoreceptors. *Ann Biomed Engineer* 32: 1428-1442.
19. Usui S, Ishihara A, Kamiyama Y, Ishii H (1996) Ionic current model of bipolar cells in the lower vertebrate retina. *Vision Res* 36: 4069-4076.
20. Kaneko A, Pinto LH, Tachibana M (1989) Transient calcium current of retinal bipolar cells of the mouse. *J Physiol* 410: 613-629.
21. Yu-Ping M, Cui J, Hu H, Pan Z (2003) Mammalian retinal bipolar cells express inwardly rectifying  $k^+$  currents ( $i_{K_{ir}}$ ) with a different distribution than that of  $i_h$ . *J Neurophysiol* 90: 3479-3489.
22. Berntson A, Smith R, Taylor W (2004) Postsynaptic calcium feedback between rods and rod bipolar cells in the mouse retina. *Visual Neurosci* 21: 913-924.
23. Boss R, Schneider H, Wässle H (1993) Voltage and transmitter gated currents of aii amacrine cells in a slice preparation of the rat retina. *J Neurosci* 13: 2874-2888.
24. Smith RG, Vardi N (1995) Simulation of the aii amacrine cell of mammalian retina: Functional consequences of electrical coupling and regenerative membrane properties. *Visual Neurosci* 12: 851-860.
25. Fohlmeister J, Miller R (1997) Impulse encoding mechanisms of ganglion cells in the tiger salamander retina. *J Neurophysiol* 78: 1395-1947.
26. Zhang J, Wu SM (2005) Physiological properties of rod photoreceptor electrical coupling in the tiger salamander retina. *J Physiol* 564: 849-863.
27. von Gersdorff H (2001) Synaptic ribbons: versatile signal transducers. *Neuron* 29: 7-10.
28. Lagnado L (2003) Ribbon synapses. *Curr Biol* 13: R631.

29. Sikora MA, Gottesman J, Miller RF (2005) A computational model of the ribbon synapse. *J Neurosci Methods* 145: 47-61.
30. Mulloney B (2003) During fictive locomotion, graded synaptic currents drive bursts of impulses in swimmeret motor neurons. *J Neurosci* 23: 5953-5962.
31. Jacoby RA, Wu SM (2001) Ampa-preferring receptors mediate excitatory non-nmda responses of primate retinal ganglion cells. *Vis Neurosci* 18: 703-710.
32. Mukai S, Mishima HK, Shoge K, Shinya M, Ishihara K, et al. (2002) Existence of ionotropic glutamate receptor subtypes in cultured rat retinal ganglion cells obtained by the magnetic cell sorter method and inhibitory effects of 20-hydroxyecdysone, a neurosteroid, on the glutamate response. *Jap J Pharmacol* 89: 44-52.
33. Awatramani GB, Slaughter MM (2001) Intensity-dependent, rapid activation of presynaptic metabotropic glutamate receptors at a central synapse. *J Neurosci* 21: 741-749.
34. Rodieck RW (1988) The primate retina. *Comp Primate Biol* 41: 203-278.
35. LI W, DeVries S (2004) Separate blue and green cone networks in the mammalian retina. *NatNeurosci* 7: 745-750.
36. Pugh EN, Lamb TD (2000) Phototransduction in vertebrate rods and cones: molecular mechanisms of amplification, recovery and light adaptation. In: Preencher, editor, *Handbook of Biological Physics*, Amsterdam: Elsevier. pp. 183-255.
37. Hines ML, Carnevale NT (1997) The neuron simulation environment. *Neural Comput* 9: 1179-1209.
38. Carnevale T, Hines M (2006) *The NEURON Book*. Cambridge: Cambridge University Press, first edition.
39. Jones G (1995) Light adaptation and the rising phase of the flash photocurrent of salamander retinal rods. *J Physiol* 487: 3: 11167-11177.
40. Hennig MH, Adams C, Willshaw D, Sernagor E (2009) Early-Stage Waves in the Retinal Network Emerge Close to a Critical State Transition between Local and Global Functional Connectivity. *J Neurosci* 28: 1077-1086.
41. Beggs JM, Plenz D (2003) Neuronal avalanches in neocortical circuits. *J Neurosci* 23: 441-451.
42. Shew WL, Yang H, Petermann T, Roy R, Plenz D (2009) Neuronal avalanches imply maximum dynamic range in cortical networks at criticality. [arXiv:0906.0527](https://arxiv.org/abs/0906.0527).
43. Eguluz VM, Chialvo DR, Cecchi GA, Baliki M, Apkarian AV (2005) Scale-free brain functional networks *Phys Rev Lett* 94: 018102.
44. Kitzbichler MG, Smith ML, Christensen SR, Bullmore E (2009) Broadband criticality of human brain network synchronization. *PLoS Comput Biol* 5: e1000314.
45. Stevens S (1975) *Psychophysics: Introduction to its Perceptual, Neural and Social Prospects*. New York: Wiley, first edition.
46. Hodgkin AL, Huxley AF (1952) A quantitative description of membrane current and its application to conduction and excitation in nerve. *J Physiol* 117: 500-544.

47. Ogura T, Sato TO, Usui S (2003) A simulation analysis on mechanisms of damped oscillation in retinal rod photoreceptor cells. *Vision Res* 43: 2019-2028.
48. Mao BQ, Maclish PR, Victor JD (2003) Role of Hyperpolarization-Activated Currents for the Intrinsic Dynamics of Isolated Retinal Neurons. *Vision Res* 83: 2756-2767.
