# Supplementary material for: A Computational Study on the Role of Gap Junctions and Rod Ih Conductance in the Enhancement of the Dynamic Range of the Retina
Source: PLoS One. 2009 Sep 24;4(9):e6970. doi: 10.1371/journal.pone.0006970 (PMC2745074; doi:10.1371/journal.pone.0006970)
Supplement: Table S4 — Equations for the AII amacrine cell model. (0.00 MB TEX) [file pone.0006970.s005.tex]

% Template for PLoS
% Version 1.0 January 2009
%
% To compile to pdf, run:
% latex plos.template
% bibtex plos.template
% latex plos.template
% latex plos.template
% dvipdf plos.template

\documentclass[10pt]{article}
%
%
\usepackage{graphicx}
\usepackage{amsmath}
\usepackage{amssymb}
\usepackage{cite}
\usepackage{color} 

  
 % Use doublespacing - comment out for single spacing
%\usepackage{setspace} 
%\doublespacing


% Text layout
\topmargin 0.0cm
\oddsidemargin 0.5cm
\evensidemargin 0.5cm
\textwidth 16cm 
\textheight 21cm 


% Bold the 'Figure #' in the caption and separate it with a period
% Captions will be left justified
\usepackage[labelfont=bf,labelsep=period,justification=raggedright]{caption} 

\begin{document}


\section*{Supporting Information}

\begin{table}[ht]
%\caption{Equations for the AII amacrine cell model.}
\scriptsize
\label{tab:7}
\begin{tabular}{|c|c|c|}
\hline
Ionic Current & $\alpha(V)$ and $\beta(V)$ rates & Reference\\
\hline 
$I_{Na} = g_{Kv}m^3h(V-E_Na)$ & $\alpha_m=\dfrac{0.1(25-V)}{(e^{(25-V)/10}-1)}$ & [24]\\
&$\beta_m=4e^{-V/18}$&\\
&$\alpha_h=0.0014e^{-V/20}$&\\
&$\beta_h=\dfrac{0.2}{(1+e^{(30-V)/10})}$&\\
\hline
$I_{K} = g_{KCa}n^4(V-E_K)$ &  $\alpha_m=\dfrac{0.02(10-V)}{(e^{(10-V)/10}-1)}$ & [24]\\
&$\beta=0.025e^{-V/80}$&\\
\hline\end{tabular}
\end{table}
\normalsize


\end{document}
